# Supplementary material
Source: publisher figshare collection journal article supplement (https://gsapubs.figshare.com/ndownloader/files/33946607)
Supplement: Supplementary file 1 [file 33946607]

## Sheet: Table S3 WiscSIMS_datatable
Table S3. WiscSIMS datatable
File	Comment	d18O [VSMOW]	2SD	Bias	d18O_meas	d18O-2SE	16O(E9 cps)	IP(nA)	Yield(E9cps/nA)	date	time	Time series (min)	X	Y	DTFA-X	DTFA-Y	Mass	L2'-bkg	H1-bkg	Sample Name	16O1H/16O	bckg sub
20140219@181.asc	WI-STD-74
20140219@182.asc	WI-STD-74 KIM-5 g4				5.284	0.216	2.73672	2.05676	1.3306	2014-02-19	08:23:00	1943	4898	287	-2	2	898826	481394	-48556	KIM-5/	0.000181021
20140219@183.asc	WI-STD-74 KIM-5 g3				5.318	0.212	2.73327	2.05508	1.33001	2014-02-19	08:26:00	1946	3898	287	-2	3	898826	481394	-48556	KIM-5/	0.000272923
20140219@184.asc	WI-STD-74 KIM-5 g2				5.188	0.291	2.72619	2.05476	1.32677	2014-02-19	08:30:00	1950	3246	-115	-2	0	898826	481394	-48556	KIM-5/	0.000215948
20140219@185.asc	WI-STD-74 KIM-5 g1				5.257	0.201	2.73	2.05574	1.32799	2014-02-19	08:33:00	1953	2216	67	1	2	898826	481394	-48556	KIM-5/	0.000187039
	average and 2SD				5.26175	0.110277
	ESG43
20140219@186.asc	ESG43 KIM-5				5.234	0.193	2.71928	2.05922	1.32054	2014-02-19	08:42:00	1962	-450	264	9	12	898826	481394	-48556	KIM-5/	0.000498313
20140219@187.asc	ESG43 KIM-5				5.015	0.205	2.72452	2.05887	1.32331	2014-02-19	08:45:00	1965	-450	244	9	12	898826	481394	-48556	KIM-5/	0.000501532
20140219@188.asc	ESG43 KIM-5				5.152	0.218	2.72453	2.0593	1.32304	2014-02-19	08:49:00	1969	-450	224	8	12	898826	481394	-48556	KIM-5/	0.000511251
20140219@189.asc	ESG43 KIM-5				5.084	0.283	2.72331	2.06032	1.32179	2014-02-19	08:52:00	1972	-450	204	9	11	898826	481394	-48556	KIM-5/	0.000517076
	average and 2SD				5.12125	0.187385															0.000507043
20140219@190.asc	NS2A-1.1	7.0842	0.161085		7.108	0.276	2.70771	2.05586	1.31707	2014-02-19	08:57:00	1977	-885	-863	10	7	898826	481394	-48556	NS2A-1.1	0.000534139	-2.91105e-05
20140219@191.asc	NS2A-1.2	7.96518	0.161085		7.989	0.241	2.68956	2.05555	1.30844	2014-02-19	09:01:00	1981	-873	-982	11	6	898826	481394	-48556	NS2A-1.2	0.000575172	1.19224e-05
20140219@192.asc	NS2A-2.1	6.68621	0.161085		6.71	0.178	2.71773	2.05613	1.32177	2014-02-19	09:05:00	1985	542	-913	7	5	898826	481394	-48556	NS2A-2.1	0.000561185	-2.06462e-06
20140219@193.asc	NS2A-2.2	7.86118	0.161085		7.885	0.21	2.70382	2.05958	1.31281	2014-02-19	09:09:00	1989	486	-897	7	5	898826	481394	-48556	NS2A-2.2	0.000592229	2.89797e-05
20140219@194.asc	NS2A-3.1	8.20818	0.161085		8.232	0.216	2.72667	2.06384	1.32116	2014-02-19	09:13:00	1993	1750	-470	3	8	898826	481394	-48556	NS2A-3.1	0.000641269	7.80193e-05
20140219@195.asc	NS2A-3.2	7.90618	0.161085		7.93	0.25	2.73077	2.06509	1.32235	2014-02-19	09:16:00	1996	1709	-487	4	8	898826	481394	-48556	NS2A-3.2	0.000710929	0.000147679
20140219@196.asc	NS2A-4.1	3.85528	0.161085		3.879	0.23	2.72023	2.0611	1.31979	2014-02-19	09:20:00	2000	112	-829	10	5	898826	481394	-48556	NS2A-4.1	0.000741413	0.000178163
20140219@197.asc	NS2A-4.2	7.71119	0.161085		7.735	0.211	2.72654	2.0613	1.32273	2014-02-19	09:24:00	2004	125	-767	9	6	898826	481394	-48556	NS2A-4.2	0.00057075	7.50018e-06
20140219@198.asc	NS2A-5.1	7.1622	0.161085		7.186	0.388	2.70846	2.06008	1.31473	2014-02-19	09:28:00	2008	-1101	-954	12	4	898826	481394	-48556	NS2A-5.1	0.000614992	5.17419e-05
20140219@199.asc	NS2A-5.2	7.88118	0.161085		7.905	0.26	2.71248	2.05488	1.32002	2014-02-19	09:31:00	2011	-1110	-893	11	4	898826	481394	-48556	NS2A-5.2	0.000607168	4.39182e-05
20140219@200.asc	ESG43 KIM-5				5.176	0.246	2.71953	2.05598	1.32274	2014-02-19	09:35:00	2015	-475	263	7	9	898826	481394	-48556	KIM-5/	0.000591931
20140219@201.asc	ESG43 KIM-5				4.998	0.16	2.72589	2.05793	1.32457	2014-02-19	09:39:00	2019	-475	243	7	9	898826	481394	-48556	KIM-5/	0.0006226
20140219@202.asc	ESG43 KIM-5				5.1	0.209	2.71257	2.055	1.31999	2014-02-19	09:42:00	2022	-475	223	7	9	898826	481394	-48556	KIM-5/	0.000638689
20140219@203.asc	ESG43 KIM-5				5.151	0.22	2.714	2.05535	1.32046	2014-02-19	09:45:00	2025	-475	203	7	9	898826	481394	-48556	KIM-5/	0.000624604
	average and 2SD				5.10625	0.157585															0.000619456
	bracket average and 2SD	5.09		0.0236297	5.11375	0.161085															0.00056325
20140219@204.asc	NS2A-6.1	5.28375	0.27474		5.3	0.261	2.72427	2.06079	1.32196	2014-02-19	09:50:00	2030	-210	-898	6	5	898826	481394	-48556	NS2A-6.1	0.000650001	-3.12473e-05
20140219@205.asc	NS2A-6.2	8.1027	0.27474		8.119	0.232	2.72737	2.0665	1.3198	2014-02-19	09:53:00	2033	-220	-814	5	5	898826	481394	-48556	NS2A-6.2	0.000622823	-5.84257e-05
20140219@206.asc	NS2A-7.1	7.36871	0.27474		7.385	0.234	2.70725	2.06317	1.31218	2014-02-19	09:57:00	2037	-27	-794	5	6	898826	481394	-48556	NS2A-7.1	0.000735384	5.41354e-05
20140219@207.asc	NS2A-7.2	8.1137	0.27474		8.13	0.248	2.70994	2.0667	1.31124	2014-02-19	10:00:00	2040	-21	-886	6	4	898826	481394	-48556	NS2A-7.2	0.000720801	3.95529e-05
20140219@208.asc	NS2A-8.1	4.95875	0.27474		4.975	0.205	2.75145	2.07456	1.32629	2014-02-19	10:04:00	2044	1221	-759	0	5	898826	481394	-48556	NS2A-8.1	0.000653999	-2.72495e-05
20140219@209.asc	NS2A-8.2	7.75271	0.27474		7.769	0.239	2.74278	2.07737	1.32031	2014-02-19	10:08:00	2048	1270	-838	0	4	898826	481394	-48556	NS2A-8.2	0.000661471	-1.97776e-05
20140219@210.asc	NS2A-9.1	5.23975	0.27474		5.256	0.292	2.74294	2.07773	1.32016	2014-02-19	10:12:00	2052	1758	-745	-2	6	898826	481394	-48556	NS2A-9.1	0.000636869	-4.43789e-05
20140219@211.asc	NS2A-9.2	7.83271	0.27474		7.849	0.198	2.75333	2.08031	1.32352	2014-02-19	10:16:00	2056	1799	-679	-2	6	898826	481394	-48556	NS2A-9.2	0.000650407	-3.08413e-05
20140219@212.asc	NS2A-10.1	5.46074	0.27474		5.477	0.213	2.76272	2.08778	1.32328	2014-02-19	10:19:00	2059	2047	-805	-3	5	898826	481394	-48556	NS2A-10.1	0.000674756	-6.49259e-06
20140219@213.asc	NS2A-10.2	7.76971	0.27474		7.786	0.222	2.7699	2.0895	1.32563	2014-02-19	10:23:00	2063	2042	-709	-4	5	898826	481394	-48556	NS2A-10.2	0.00075454	7.32917e-05
20140219@214.asc	NS2A-11.1	8.75069	0.27474		8.767	0.161	2.75404	2.08876	1.31851	2014-02-19	10:27:00	2067	2179	-494	-3	7	898826	481394	-48556	NS2A-11.1	0.000671956	-9.29169e-06
20140219@215.asc	NS2A-12.1	5.65374	0.27474		5.67	0.208	2.73188	2.0886	1.308	2014-02-19	10:30:00	2070	1627	-648	-2	6	898826	481394	-48556	NS2A-12.1	0.000648629	-3.26189e-05
20140219@216.asc	NS2A-13.1	9.37868	0.27474		9.395	0.267	2.74617	2.08911	1.31452	2014-02-19	10:34:00	2074	1421	-613	-1	6	898826	481394	-48556	NS2A-13.1	0.000639674	-4.15739e-05
20140219@217.asc	NS2A-14.1	8.4237	0.27474		8.44	0.25	2.73958	2.08887	1.31151	2014-02-19	10:38:00	2078	1456	-772	-1	5	898826	481394	-48556	NS2A-14.1	0.000677159	-4.08929e-06
20140219@218.asc	91500	9.99267	0.27474		10.009	0.167	2.78064	2.08144	1.33592	2014-02-19	10:42:00	2082	-3156	466	2	13	898826	481394	-48556	91500	0.000632271	-4.89769e-05
20140219@219.asc	ESG43 KIM-5				5.122	0.264	2.78532	2.08113	1.33837	2014-02-19	10:47:00	2087	-430	265	-10	11	898826	481394	-48556	KIM-5/	0.000688165
20140219@220.asc	ESG43 KIM-5				5.164	0.218	2.77641	2.07816	1.336	2014-02-19	10:51:00	2091	-430	245	-10	10	898826	481394	-48556	KIM-5/	0.000762548
20140219@221.asc	ESG43 KIM-5				5.301	0.189	2.7816	2.07784	1.33869	2014-02-19	10:54:00	2094	-430	225	-10	9	898826	481394	-48556	KIM-5/	0.000751831
20140219@222.asc	ESG43 KIM-5				4.838	0.251	2.77692	2.07839	1.33609	2014-02-19	10:58:00	2098	-430	205	-10	9	898826	481394	-48556	KIM-5/	0.000769616
	average and 2SD				5.10625	0.388962															0.00074304
	bracket average and 2SD	5.09		0.0161677	5.10625	0.27474															0.000681248
20140219@223.asc	SCKG-1.1	8.44862	0.349519		8.444	0.23	2.71707	2.07659	1.30843	2014-02-19	11:03:00	2103	-2355	-2192	0	1	898826	481394	-48556	SCKG-1.1	0.000707775	-3.79923e-05
20140219@224.asc	SCKG-1.2	8.17761	0.349519		8.173	0.211	2.72448	2.07467	1.31321	2014-02-19	11:07:00	2107	-2333	-2229	-1	0	898826	481394	-48556	SCKG-1.2	0.000780686	3.49188e-05
20140219@225.asc	SCKG-2.1	6.1296	0.349519		6.125	0.271	2.7263	2.0735	1.31483	2014-02-19	11:10:00	2110	-2071	-2404	-3	-3	898826	481394	-48556	SCKG-2.1	0.000727543	-1.82238e-05
20140219@226.asc	SCKG-2.2	8.07561	0.349519		8.071	0.236	2.70379	2.0699	1.30624	2014-02-19	11:14:00	2114	-2125	-2391	-3	-2	898826	481394	-48556	SCKG-2.2	0.000721436	-2.43307e-05
20140219@227.asc	SCKG-3.1	8.42062	0.349519		8.416	0.234	2.71719	2.05762	1.32055	2014-02-19	11:18:00	2118	-1463	-2319	-7	-2	898826	481394	-48556	SCKG-3.1	0.000703372	-4.2395e-05
20140219@228.asc	SCKG-4.1	6.37861	0.349519		6.374	0.209	2.69847	2.05383	1.31388	2014-02-19	11:22:00	2122	-1766	-2053	-5	1	898826	481394	-48556	SCKG-4.1	0.000712941	-3.28255e-05
20140219@229.asc	SCKG-5.1	7.79061	0.349519		7.786	0.185	2.71314	2.0507	1.32303	2014-02-19	11:26:00	2126	-473	-1925	-10	2	898826	481394	-48556	SCKG-5.1	0.000701184	-4.45833e-05
20140219@230.asc	SCKG-6.1	8.07261	0.349519		8.068	0.23	2.66634	2.04072	1.30657	2014-02-19	11:31:00	2131	117	-2249	0	-3	898826	481394	-48556	SCKG-6.1	0.000717	-2.87667e-05
20140219@231.asc	SCKG-7.1	7.55261	0.349519		7.548	0.187	2.65099	2.03298	1.304	2014-02-19	11:35:00	2135	757	-2217	-4	-2	898826	481394	-48556	SCKG-7.1	0.000723621	-2.21453e-05
20140219@232.asc	SCKG-7.2	8.08761	0.349519		8.083	0.229	2.62592	2.0257	1.2963	2014-02-19	11:38:00	2138	730	-2273	-3	-3	898826	481394	-48556	SCKG-7.2	0.000745632	-1.34862e-07
20140219@233.asc	SCKG-8.1	6.0496	0.349519		6.045	0.204	2.62369	2.01592	1.30149	2014-02-19	11:43:00	2143	1144	-2157	-5	-2	898826	481394	-48556	SCKG-8.1	0.000676016	-6.97512e-05
20140219@234.asc	SCKG-9.1	8.19461	0.349519		8.19	0.182	2.61335	2.00591	1.30282	2014-02-19	11:47:00	2147	2226	-1995	-7	0	898826	481394	-48556	SCKG-9.1	0.00072156	-2.42064e-05
20140219@235.asc	SCKG-10.1	6.0996	0.349519		6.095	0.238	2.61088	2.00176	1.30429	2014-02-19	11:51:00	2151	2614	-1943	-9	1	898826	481394	-48556	SCKG-10.1	0.000696322	-4.94448e-05
20140219@236.asc	SCKG-11.1	5.0646	0.349519		5.06	0.242	2.59603	1.99977	1.29816	2014-02-19	11:54:00	2154	3714	-1990	-12	2	898826	481394	-48556	SCKG-11.1	0.000825916	8.0149e-05
20140219@237.asc	91500	9.89962	0.349519		9.895	0.194	2.5941	1.98995	1.3036	2014-02-19	11:59:00	2159	-3178	465	10	13	898826	481394	-48556	91500	0.000678805	-6.69622e-05
20140219@238.asc	ESG43 KIM-5				5.002	0.271	2.60242	1.98361	1.31196	2014-02-19	12:03:00	2163	-410	271	-3	10	898826	481394	-48556	KIM-5/	0.000748493
	average and 2SD				5.002	0.271															0.000748493
	bracket average and 2SD	5.09		-0.0045767	5.0854	0.349519															0.000745767
	Shutdown (power shortage)
	retuned
	WI-STD-74
20140219@239.asc	WI-STD-74 KIM-5 g1				5.089	0.215	2.72111	2.16241	1.25837	2014-02-19	15:35:00	2375	1918	-125	5	-5	898729	484562	-50677	KIM-5/	0.000185954
20140219@240.asc	WI-STD-74 KIM-5 g1, L2=1786				4.896	0.248	2.63039	2.05019	1.283	2014-02-19	15:39:00	2379	1894	-98	4	-5	898729	484562	-50677	KIM-5/	0.000181835
20140219@241.asc	WI-STD-74 KIM-5 g2				5.143	0.184	2.63576	2.05031	1.28554	2014-02-19	15:42:00	2382	2965	-206	3	-5	898729	484562	-50677	KIM-5/	0.000211245
20140219@242.asc	WI-STD-74 KIM-5 g3				5.001	0.204	2.63479	2.04929	1.28571	2014-02-19	15:46:00	2386	3967	246	2	-3	898729	484562	-50677	KIM-5/	0.000177718
	average and 2SD				5.03225	0.216107
20140219@243.asc	ESG43 KIM-5				5.05	0.163	2.66526	2.04612	1.30259	2014-02-19	15:52:00	2392	-408	217	4	9	898729	484562	-50677	KIM-5/	0.000443272
20140219@244.asc	ESG43 KIM-5				4.755	0.192	2.63421	2.0471	1.2868	2014-02-19	15:57:00	2397	-408	197	14	7	898729	484562	-50677	KIM-5/	0.000467661
20140219@245.asc	ESG43 KIM-5				4.902	0.238	2.62428	2.048	1.28139	2014-02-19	16:00:00	2400	-408	177	15	8	898729	484562	-50677	KIM-5/	0.000474485
20140219@246.asc	ESG43 KIM-5				4.958	0.175	2.62491	2.05027	1.28028	2014-02-19	16:03:00	2403	-408	157	16	7	898729	484562	-50677	KIM-5/	0.000493981
	average and 2SD				4.91625	0.247216															0.00046985
20140219@247.asc	20-210-1.1	7.32831	0.213649		7.19	0.254	2.60982	2.05656	1.26902	2014-02-19	16:08:00	2408	197	2476	15	18	898729	484562	-50677	20-210-1.1	0.000506652	-4.66664e-06
20140219@248.asc	20-210-1.2	7.68136	0.213649		7.543	0.206	2.61566	2.05758	1.27123	2014-02-19	16:11:00	2411	211	2557	14	19	898729	484562	-50677	20-210-1.2	0.000527479	1.61606e-05
20140219@249.asc	20-210-2.1	8.10241	0.213649		7.964	0.228	2.62897	2.05688	1.27813	2014-02-19	16:15:00	2415	109	2285	12	15	898729	484562	-50677	20-210-2.1	0.000539145	2.78267e-05
20140219@250.asc	20-210-2.2	7.52333	0.213649		7.385	0.276	2.61801	2.0595	1.27119	2014-02-19	16:18:00	2418	118	2207	12	15	898729	484562	-50677	20-210-2.2	0.000590473	7.91544e-05
20140219@251.asc	20-210-3.1	4.87097	0.213649		4.733	0.195	2.64053	2.06212	1.2805	2014-02-19	16:22:00	2422	978	2558	9	18	898729	484562	-50677	20-210-3.1	0.000541074	2.97554e-05
20140219@252.asc	20-210-3.2	7.40732	0.213649		7.269	0.213	2.63477	2.06591	1.27535	2014-02-19	16:26:00	2426	1024	2512	9	18	898729	484562	-50677	20-210-3.2	0.000549638	3.83196e-05
20140219@253.asc	20-210-4.1	8.61448	0.213649		8.476	0.235	2.64674	2.06583	1.2812	2014-02-19	16:29:00	2429	1521	2346	6	16	898729	484562	-50677	20-210-4.1	0.000524385	1.3067e-05
20140219@254.asc	20-210-4.2	7.68336	0.213649		7.545	0.24	2.63127	2.07061	1.27077	2014-02-19	16:32:00	2432	1482	2275	7	15	898729	484562	-50677	20-210-4.2	0.000548234	3.69152e-05
20140219@255.asc	20-210-5.1	8.7265	0.213649		8.588	0.179	2.64418	2.06826	1.27846	2014-02-19	16:36:00	2436	1973	2461	5	17	898729	484562	-50677	20-210-5.1	0.000545563	3.4245e-05
20140219@256.asc	20-210-5.2	7.92039	0.213649		7.782	0.238	2.62722	2.07018	1.26908	2014-02-19	16:40:00	2440	1949	2512	5	17	898729	484562	-50677	20-210-5.2	0.000579962	6.86436e-05
20140219@257.asc	ESG43 KIM-5				5.115	0.262	2.66981	2.07409	1.28722	2014-02-19	16:44:00	2444	-507	215	10	7	898729	484562	-50677	KIM-5/	0.000540138
20140219@258.asc	ESG43 KIM-5				4.961	0.203	2.66989	2.0787	1.2844	2014-02-19	16:47:00	2447	-507	195	10	6	898729	484562	-50677	KIM-5/	0.00054982
20140219@259.asc	ESG43 KIM-5				4.968	0.253	2.66476	2.07921	1.28162	2014-02-19	16:50:00	2450	-507	175	10	6	898729	484562	-50677	KIM-5/	0.000555554
20140219@260.asc	ESG43 KIM-5				4.907	0.236	2.67716	2.08148	1.28618	2014-02-19	16:53:00	2453	-507	155	10	6	898729	484562	-50677	KIM-5/	0.000565639
	average and 2SD				4.98775	0.178209															0.000552788
	bracket average and 2SD	5.09		-0.137301	4.952	0.213649															0.000511319
20140219@261.asc	20-210-6.1	8.13161	0.152015		8.053	0.173	2.65872	2.08121	1.27749	2014-02-19	16:59:00	2459	2350	2257	4	14	898729	484562	-50677	20-210-6.1	0.000568497	-6.14953e-06
20140219@262.asc	20-210-6.2	7.71758	0.152015		7.639	0.21	2.6432	2.08731	1.26632	2014-02-19	17:02:00	2462	2300	2209	4	13	898729	484562	-50677	20-210-6.2	0.000612176	3.753e-05
20140219@263.asc	20-210-7.1	9.13569	0.152015		9.057	0.263	2.67095	2.0866	1.28005	2014-02-19	17:06:00	2466	2899	2529	2	16	898729	484562	-50677	20-210-7.1	0.000568729	-5.91773e-06
20140219@264.asc	20-210-7.2	7.45756	0.152015		7.379	0.213	2.65101	2.08891	1.26909	2014-02-19	17:09:00	2469	2889	2616	2	16	898729	484562	-50677	20-210-7.2	0.000592486	1.78398e-05
20140219@265.asc	20-210-8.1	7.34655	0.152015		7.268	0.174	2.66009	2.08923	1.27324	2014-02-19	17:13:00	2473	3152	2390	1	14	898729	484562	-50677	20-210-8.1	0.000772695	0.000198049
20140219@266.asc	91500	9.88575	0.152015		9.807	0.163	2.66718	2.0875	1.27769	2014-02-19	17:17:00	2477	-3209	458	16	9	898729	484562	-50677	91500	0.000535592	-3.90548e-05
[SAMPLE FROM ANOTHER PROJECT]
[SAMPLE FROM ANOTHER PROJECT]
[SAMPLE FROM ANOTHER PROJECT]
[SAMPLE FROM ANOTHER PROJECT]
[SAMPLE FROM ANOTHER PROJECT]
[SAMPLE FROM ANOTHER PROJECT]
[SAMPLE FROM ANOTHER PROJECT]
[SAMPLE FROM ANOTHER PROJECT]
[SAMPLE FROM ANOTHER PROJECT]
20140219@276.asc	ESG43 KIM-5				5.096	0.257	2.69691	2.09834	1.28526	2014-02-19	17:53:00	2513	-539	191	3	6	898729	484562	-50677	KIM-5/	0.00058928
20140219@277.asc	ESG43 KIM-5				5.083	0.168	2.68722	2.09705	1.28143	2014-02-19	17:56:00	2516	-539	171	3	6	898729	484562	-50677	KIM-5/	0.00059801
20140219@278.asc	ESG43 KIM-5				4.994	0.255	2.68383	2.09541	1.28082	2014-02-19	17:59:00	2519	-539	151	2	6	898729	484562	-50677	KIM-5/	0.000599906
20140219@279.asc	ESG43 KIM-5				4.969	0.191	2.68583	2.09631	1.28122	2014-02-19	18:02:00	2522	-539	131	2	6	898729	484562	-50677	KIM-5/	0.000598825
	average and 2SD				5.0355	0.126812															0.000596505
	bracket average and 2SD	5.09		-0.0779781	5.01162	0.152015															0.000574646
[SAMPLE FROM ANOTHER PROJECT]
[SAMPLE FROM ANOTHER PROJECT]
[SAMPLE FROM ANOTHER PROJECT]
[SAMPLE FROM ANOTHER PROJECT]
[SAMPLE FROM ANOTHER PROJECT]
[SAMPLE FROM ANOTHER PROJECT]
[SAMPLE FROM ANOTHER PROJECT]
[SAMPLE FROM ANOTHER PROJECT]
[SAMPLE FROM ANOTHER PROJECT]
[SAMPLE FROM ANOTHER PROJECT]
[SAMPLE FROM ANOTHER PROJECT]
[SAMPLE FROM ANOTHER PROJECT]
[SAMPLE FROM ANOTHER PROJECT]
[SAMPLE FROM ANOTHER PROJECT]
[SAMPLE FROM ANOTHER PROJECT]
20140219@295.asc	ESG43 KIM-5				4.932	0.203	2.60846	2.04941	1.27279	2014-02-19	18:57:00	2577	-387	248	12	8	898729	484562	-50677	KIM-5/	0.000594012
20140219@296.asc	ESG43 KIM-5				4.85	0.222	2.60849	2.0503	1.27224	2014-02-19	19:00:00	2580	-387	228	12	8	898729	484562	-50677	KIM-5/	0.00060894
20140219@297.asc	ESG43 KIM-5				4.855	0.22	2.61645	2.05277	1.2746	2014-02-19	19:03:00	2583	-387	208	12	7	898729	484562	-50677	KIM-5/	0.000637574
20140219@298.asc	ESG43 KIM-5				4.917	0.2	2.61243	2.05218	1.273	2014-02-19	19:07:00	2587	-387	188	12	6	898729	484562	-50677	KIM-5/	0.00064111
	average and 2SD				4.8885	0.0841348															0.000620409
	bracket average and 2SD	5.09		-0.127352	4.962	0.186069
20140219@299.asc	89DM-1.1	6.04541	0.15673		5.873	0.194	2.56522	2.03673	1.25948	2014-02-19	19:11:00	2591	993	1663	6	12	898729	484562	-50677	89DM-1.1	0.000652881	4.80189e-05
20140219@300.asc	89DM-2.1	6.15043	0.15673		5.978	0.234	2.54324	2.02989	1.25289	2014-02-19	19:14:00	2594	1166	1591	6	13	898729	484562	-50677	89DM-2.1	0.000626256	2.13935e-05
20140219@301.asc	89DM-3.1	8.71987	0.15673		8.547	0.248	2.55568	2.03618	1.25513	2014-02-19	19:18:00	2598	1301	1683	6	13	898729	484562	-50677	89DM-3.1	0.000700244	9.5382e-05
20140219@302.asc	89DM-4.1	6.32146	0.15673		6.149	0.21	2.55037	2.03708	1.25197	2014-02-19	19:21:00	2601	1669	1803	4	12	898729	484562	-50677	89DM-4.1	0.000651543	4.66807e-05
20140219@303.asc	91500	9.89007	0.15673		9.717	0.201	2.57308	2.03724	1.26302	2014-02-19	19:25:00	2605	-3134	461	15	9	898729	484562	-50677	91500	0.000574841	-3.00215e-05
[SAMPLE FROM ANOTHER PROJECT]
[SAMPLE FROM ANOTHER PROJECT]
[SAMPLE FROM ANOTHER PROJECT]
[SAMPLE FROM ANOTHER PROJECT]
[SAMPLE FROM ANOTHER PROJECT]
20140219@309.asc	ESG43 KIM-5				4.981	0.175	2.59357	2.04436	1.26865	2014-02-19	19:48:00	2628	-443	182	12	6	898729	484562	-50677	KIM-5/	0.000574131
20140219@310.asc	ESG43 KIM-5				4.933	0.243	2.602	2.05046	1.26898	2014-02-19	19:51:00	2631	-443	162	12	6	898729	484562	-50677	KIM-5/	0.000581095
20140219@311.asc	ESG43 KIM-5				4.816	0.197	2.59	2.05011	1.26335	2014-02-19	19:54:00	2634	-483	162	12	6	898729	484562	-50677	KIM-5/	0.000604522
20140219@312.asc	ESG43 KIM-5				5.058	0.249	2.56945	2.04409	1.25702	2014-02-19	19:57:00	2637	-483	142	12	6	898729	484562	-50677	KIM-5/	0.000597517
	average and 2SD				4.947	0.202761															0.000589316
	bracket average and 2SD	5.09		-0.171378	4.91775	0.15673															0.000604863
20140220@312.asc	WI-STD-74
20140220@313.asc	WI-STD-74 KIM-5 g4				4.782	0.166	2.56332	2.0708	1.23784	2014-02-20	08:21:00	3381	4916	235	-1	1	898729	482274	-50985	KIM-5/	0.000187908
20140220@314.asc	WI-STD-74 KIM-5 g3				5.013	0.253	2.56496	2.07538	1.2359	2014-02-20	08:24:00	3384	3960	295	-1	1	898729	482274	-50985	KIM-5/	0.00017336
20140220@315.asc	WI-STD-74 KIM-5 g2				4.807	0.174	2.60209	2.07898	1.25162	2014-02-20	08:28:00	3388	3043	-251	-6	-1	898729	482274	-50985	KIM-5/	0.000185543
20140220@316.asc	WI-STD-74 KIM-5 g1				4.946	0.189	2.60493	2.08093	1.25181	2014-02-20	08:31:00	3391	1949	-121	-5	0	898729	482274	-50985	KIM-5/	0.000186355
	average and 2SD				4.887	0.221456
	ESG32
20140220@317.asc	ESG32 KIM-5				4.923	0.207	2.6108	2.07663	1.25723	2014-02-20	08:40:00	3400	397	281	0	-19	898729	482274	-50985	KIM-5/	0.000554504
20140220@318.asc	ESG32 KIM-5				4.874	0.169	2.61208	2.07843	1.25676	2014-02-20	08:43:00	3403	397	261	1	-19	898729	482274	-50985	KIM-5/	0.000567334
20140220@319.asc	ESG32 KIM-5				4.866	0.188	2.61777	2.07937	1.25892	2014-02-20	08:46:00	3406	397	241	0	-20	898729	482274	-50985	KIM-5/	0.000584333
20140220@320.asc	ESG32 KIM-5				4.937	0.268	2.61259	2.078	1.25726	2014-02-20	08:50:00	3410	397	221	0	-22	898729	482274	-50985	KIM-5/	0.000592104
	average and 2SD				4.9	0.0705219															0.000574569
20140220@321.asc	NS3A-22.1	11.1077	0.156036	11.1077	10.929	0.17	2.55417	2.07174	1.23286	2014-02-20	08:56:00	3416	-396	3533	1	-16	898729	482274	-50985	NS3A-22.1	0.00058168	-4.71364e-05
20140220@322.asc	NS3A-22.2	9.72644	0.156036		9.548	0.249	2.57885	2.06982	1.24593	2014-02-20	08:59:00	3419	-329	3454	2	-16	898729	482274	-50985	NS3A-22.2	0.000830754	0.000201938
20140220@323.asc	NS3A-110.1	7.203	0.156036	7.203	7.025	0.298	2.52464	2.05519	1.22842	2014-02-20	09:05:00	3425	-1462	3278	3	-16	898729	482274	-50985	NS3A-110.1	0.000582984	-4.58325e-05
20140220@324.asc	NS3A-110.2	5.68173	0.156036		5.504	0.19	2.53763	2.06345	1.2298	2014-02-20	09:08:00	3428	-1479	3345	3	-16	898729	482274	-50985	NS3A-110.2	0.00062031	-8.50655e-06
20140220@325.asc	NS3A-115.1	9.18335	0.156036	9.18335	9.005	0.223	2.55981	2.07135	1.23582	2014-02-20	09:12:00	3432	-2364	3373	3	-16	898729	482274	-50985	NS3A-115.1	0.000617306	-1.15106e-05
20140220@326.asc	NS3A-115.2	4.63254	0.156036		4.455	0.205	2.56384	2.07776	1.23394	2014-02-20	09:16:00	3436	-2320	3283	3	-17	898729	482274	-50985	NS3A-115.2	0.000670307	4.14903e-05
20140220@327.asc	NS3A-115.3	7.92313	0.156036	7.92313	7.745	0.222	2.56096	2.07995	1.23126	2014-02-20	09:19:00	3439	-2260	3178	4	-18	898729	482274	-50985	NS3A-115.3	0.000612919	-1.58976e-05
20140220@328.asc	NS3A-115.4	5.94578	0.156036		5.768	0.165	2.56754	2.08011	1.23433	2014-02-20	09:23:00	3443	-2292	3226	5	-17	898729	482274	-50985	NS3A-115.4	0.00064249	1.36736e-05
20140220@329.asc	NS3A-114.1	6.97896	0.156036	6.97896	6.801	0.203	2.56403	2.0778	1.23401	2014-02-20	09:26:00	3446	-1983	3385	3	-16	898729	482274	-50985	NS3A-114.1	0.000655574	2.67572e-05
20140220@330.asc	NS3A-114.2	10.1665	0.156036		9.988	0.194	2.57948	2.08242	1.23869	2014-02-20	09:30:00	3450	-2053	3356	3	-17	898729	482274	-50985	NS3A-114.2	0.000687289	5.84721e-05
20140220@331.asc	ESG32 KIM-5				4.87	0.18	2.61099	2.08191	1.25413	2014-02-20	09:34:00	3454	451	305	0	-19	898729	482274	-50985	KIM-5/	0.000673636
20140220@332.asc	ESG32 KIM-5				4.849	0.198	2.60466	2.07937	1.25262	2014-02-20	09:37:00	3457	451	285	0	-20	898729	482274	-50985	KIM-5/	0.000674087
20140220@333.asc	ESG32 KIM-5				4.889	0.159	2.6084	2.07761	1.25548	2014-02-20	09:40:00	3460	451	265	0	-21	898729	482274	-50985	KIM-5/	0.000689919
20140220@334.asc	ESG32 KIM-5				5.091	0.228	2.59549	2.07698	1.24965	2014-02-20	09:43:00	3463	451	245	0	-21	898729	482274	-50985	KIM-5/	0.000694614
	average and 2SD				4.92475	0.224062															0.000683064
	bracket average and 2SD	5.09		-0.176725	4.91237	0.156036															0.000628816
20140220@335.asc	NS3A-18.2	13.0491	0.175986	13.0491	12.883	0.215	2.56766	2.07847	1.23536	2014-02-20	09:47:00	3467	1213	3497	-3	-17	898729	482274	-50985	NS3A-18.2	0.000655223	-4.98557e-05
20140220@336.asc	NS3A-18.1	7.56216	0.175986		7.397	0.141	2.58032	2.07976	1.24068	2014-02-20	09:51:00	3471	1258	3483	-3	-17	898729	482274	-50985	NS3A-18.1	0.000723978	1.88992e-05
20140220@337.asc	NS3A-15.1	6.43397	0.175986	6.43397	6.269	0.186	2.58742	2.07956	1.24421	2014-02-20	09:54:00	3474	2011	3620	1	-15	898729	482274	-50985	NS3A-15.1	0.000666429	-3.86501e-05
20140220@338.asc	NS3A-15.2	7.05407	0.175986		6.889	0.204	2.57857	2.07385	1.24337	2014-02-20	09:58:00	3478	1898	3505	0	-15	898729	482274	-50985	NS3A-15.2	0.000742652	3.75728e-05
20140220@339.asc	NS3A-15.3	7.37012	0.175986	7.37012	7.205	0.208	2.56011	2.06916	1.23727	2014-02-20	10:01:00	3481	1836	3399	1	-17	898729	482274	-50985	NS3A-15.3	0.000659201	-4.58785e-05
20140220@340.asc	NS3A-11.1	6.70301	0.175986	6.70301	6.538	0.16	2.55584	2.06247	1.23921	2014-02-20	10:05:00	3485	2625	3497	-1	-17	898729	482274	-50985	NS3A-11.1	0.000657179	-4.78995e-05
20140220@341.asc	NS3A-11.2	8.50731	0.175986		8.342	0.262	2.55459	2.06243	1.23863	2014-02-20	10:09:00	3489	2582	3611	-2	-16	898729	482274	-50985	NS3A-11.2	0.000683609	-2.14701e-05
20140220@342.asc	NS3A-10	6.95206	0.175986	6.95206	6.787	0.194	2.54152	2.06368	1.23154	2014-02-20	10:12:00	3492	2595	3295	-1	-18	898729	482274	-50985	NS3A-10	0.000676737	-2.83421e-05
20140220@343.asc	NS3A-3.1	8.37829	0.175986	8.37829	8.213	0.271	2.54987	2.06083	1.2373	2014-02-20	10:16:00	3496	3616	3762	-3	-17	898729	482274	-50985	NS3A-3.1	0.000681443	-2.36359e-05
20140220@344.asc	NS3A-3.2	9.6415	0.175986		9.476	0.213	2.56761	2.05883	1.24712	2014-02-20	10:19:00	3499	3656	3778	-4	-18	898729	482274	-50985	NS3A-3.2	0.000837797	0.000132718
20140220@345.asc	SS1-121R	8.48731	0.175986	8.49	8.322	0.212	2.5231	2.05375	1.22853	2014-02-20	10:24:00	3504	-3837	-1439	-3	-19	898729	482274	-50985	SS1-121R	0.000738591	3.35117e-05
20140220@346.asc	SS1-121.1	6.33695	0.175986		6.172	0.473	2.46928	2.05218	1.20324	2014-02-20	10:27:00	3507	-3757	-1494	-4	-19	898729	482274	-50985	SS1-121.1	0.00764304	0.00693796
20140220@347.asc	SS1-22.1	8.33828	0.175986	8.34	8.173	0.179	2.51039	2.05152	1.22367	2014-02-20	10:31:00	3511	-2409	-1612	-5	-21	898729	482274	-50985	SS1-22.1	0.000786219	8.11403e-05
20140220@348.asc	SS1-22.2	2.3553	0.175986		2.191	0.174	2.53466	2.05965	1.23062	2014-02-20	10:35:00	3515	-2335	-1604	-5	-21	898729	482274	-50985	SS1-22.2	0.000764094	5.90153e-05
20140220@349.asc	SS1-22.3	2.05925	0.175986		1.895	0.161	2.54164	2.06149	1.23291	2014-02-20	10:38:00	3518	-2364	-1610	-5	-22	898729	482274	-50985	SS1-22.3	0.000784011	7.89316e-05
20140220@350.asc	ESG32 KIM-5				4.88	0.166	2.57911	2.05563	1.25466	2014-02-20	10:43:00	3523	414	277	0	-21	898729	482274	-50985	KIM-5/	0.000720431
20140220@351.asc	ESG32 KIM-5				4.964	0.262	2.5807	2.05997	1.25279	2014-02-20	10:46:00	3526	414	257	0	-22	898729	482274	-50985	KIM-5/	0.000743144
20140220@352.asc	ESG32 KIM-5				4.849	0.235	2.59511	2.06462	1.25694	2014-02-20	10:49:00	3529	414	237	0	-22	898729	482274	-50985	KIM-5/	0.000731574
20140220@353.asc	ESG32 KIM-5				5.01	0.24	2.57365	2.06568	1.24591	2014-02-20	10:52:00	3532	414	217	0	-22	898729	482274	-50985	KIM-5/	0.000713227
	average and 2SD				4.92575	0.148525															0.000727094
	bracket average and 2SD	5.09		-0.163916	4.92525	0.175986															0.000705079
20140220@354.asc	SS1-114.1	2.44195	0.158845		2.33	0.216	2.56407	2.07127	1.23792	2014-02-20	10:56:00	3536	-2657	-1517	-6	-21	898729	482274	-50985	SS1-114.1	0.000722987	-3.71376e-05
20140220@355.asc	SS1-114.3	8.2306	0.158845	8.23	8.118	0.285	2.53736	2.07557	1.22248	2014-02-20	11:00:00	3540	-2694	-1564	-5	-22	898729	482274	-50985	SS1-114.3	0.000751639	-8.4856e-06
20140220@356.asc	SS1-114.2	2.28594	0.158845		2.174	0.224	2.5726	2.07999	1.23683	2014-02-20	11:03:00	3543	-2677	-1538	-5	-22	898729	482274	-50985	SS1-114.2	0.000800059	3.99347e-05
20140220@357.asc	SS1-3.1	4.6782	0.158845		4.566	0.178	2.58964	2.08539	1.2418	2014-02-20	11:08:00	3548	3267	-1384	-1	-24	898729	482274	-50985	SS1-3.1	0.00074398	-1.61439e-05
20140220@358.asc	SS1-9	8.28161	0.158845		8.169	0.196	2.57278	2.08571	1.23353	2014-02-20	11:12:00	3552	1479	-1390	1	-22	898729	482274	-50985	SS1-9	0.00072193	-3.81942e-05
20140220@359.asc	SS1-10.1	8.87467	0.158845	8.87	8.762	0.187	2.57958	2.08348	1.23812	2014-02-20	11:16:00	3556	1169	-1462	2	-24	898729	482274	-50985	SS1-10.1	0.00080789	4.77654e-05
20140220@360.asc	SS1-12	9.32972	0.158845	9.33	9.217	0.187	2.56963	2.07561	1.23801	2014-02-20	11:20:00	3560	252	-1287	3	-23	898729	482274	-50985	SS1-12	0.000770563	1.0439e-05
20140220@361.asc	SS1-14.2	8.28461	0.158845	8.28	8.172	0.277	2.5514	2.07201	1.23136	2014-02-20	11:23:00	3563	-414	-1265	2	-24	898729	482274	-50985	SS1-14.2	0.000768481	8.3565e-06
20140220@362.asc	SS1-14.1	7.58853	0.158845		7.476	0.232	2.58773	2.06834	1.25112	2014-02-20	11:27:00	3567	-497	-1203	1	-23	898729	482274	-50985	SS1-14.1	0.000847404	8.72794e-05
20140220@363.asc	SS1-15.1	7.89756	0.158845	7.9	7.785	0.262	2.51133	2.05171	1.22402	2014-02-20	11:31:00	3571	-987	-1424	3	-23	898729	482274	-50985	SS1-15.1	0.000767527	7.4024e-06
20140220@364.asc	SS1-15.2	1.44684	0.158845		1.335	0.198	2.55315	2.05441	1.24276	2014-02-20	11:34:00	3574	-934	-1374	2	-23	898729	482274	-50985	SS1-15.2	0.000821725	6.16012e-05
20140220@365.asc	SS1-16.1	7.40651	0.158845	7.41	7.294	0.251	2.50685	2.04639	1.22501	2014-02-20	11:38:00	3578	-1107	-1530	3	-24	898729	482274	-50985	SS1-16.1	0.000992	0.000231875
20140220@366.asc	SS1-16.2	5.29127	0.158845		5.179	0.233	2.48515	2.04471	1.2154	2014-02-20	11:41:00	3581	-1145	-1572	3	-23	898729	482274	-50985	SS1-16.2	0.00076791	7.7855e-06
20140220@367.asc	SS1-20.1	13.9502	0.158845	13.95	13.837	0.196	2.50655	2.03904	1.22928	2014-02-20	11:45:00	3585	-1808	-1358	1	-22	898729	482274	-50985	SS1-20.1	0.000732753	-2.7371e-05
20140220@368.asc	SS1-20.2	5.91234	0.158845	1.16019	5.8	0.24	2.4945	2.03751	1.22429	2014-02-20	11:49:00	3589	-1883	-1350	1	-22	898729	482274	-50985	SS1-20.2	0.000752233	-7.891e-06
20140220@369.asc	ESG32 KIM-5				5.055	0.208	2.50641	2.025	1.23774	2014-02-20	11:54:00	3594	375	291	4	-22	898729	482274	-50985	KIM-5/	0.000755012
20140220@370.asc	ESG32 KIM-5				5.047	0.179	2.50266	2.01972	1.23912	2014-02-20	11:57:00	3597	375	271	4	-22	898729	482274	-50985	KIM-5/	0.000802462
20140220@371.asc	ESG32 KIM-5				5.054	0.17	2.49005	2.01682	1.23464	2014-02-20	12:00:00	3600	375	251	4	-22	898729	482274	-50985	KIM-5/	0.000811683
20140220@372.asc	ESG32 KIM-5				4.963	0.217	2.50166	2.01764	1.23989	2014-02-20	12:03:00	3603	375	231	3	-23	898729	482274	-50985	KIM-5/	0.000803462
	average and 2SD				5.02975	0.0892842															0.000793155
	bracket average and 2SD	5.09		-0.111682	4.97775	0.158845															0.000760124
	ESG11
20140220@391.asc	ESG11 KIM-5				4.86	0.199	2.45797	2.00329	1.22697	2014-02-20	13:31:00	3691	63	-349	-8	0	898729	482274	-50985	KIM-5/	0.000559501
20140220@392.asc	ESG11 KIM-5				5.002	0.286	2.45298	1.99945	1.22682	2014-02-20	13:34:00	3694	63	-369	-8	1	898729	482274	-50985	KIM-5/	0.000574055
20140220@393.asc	ESG11 KIM-5				4.94	0.247	2.45675	1.99859	1.22924	2014-02-20	13:37:00	3697	63	-389	-9	0	898729	482274	-50985	KIM-5/	0.000588515
20140220@394.asc	ESG11 KIM-5				5.092	0.222	2.45518	1.99777	1.22896	2014-02-20	13:40:00	3700	63	-409	-9	-1	898729	482274	-50985	KIM-5/	0.000583345
	average and 2SD				4.9735	0.19616															0.000576354
20140220@395.asc	TUNG 201.2	3.40021	0.26119		3.376	0.264	2.41791	1.98346	1.21904	2014-02-20	13:47:00	3707	-4831	878	-5	-1	898729	482274	-50985	TUNG 201.2	0.000546341	-6.2274e-05
20140220@396.asc	TUNG 201.1	3.42421	0.26119		3.4	0.162	2.41329	1.98428	1.21621	2014-02-20	13:52:00	3712	-4791	814	-6	-2	898729	482274	-50985	TUNG 201.1	0.000560551	-4.80639e-05
20140220@397.asc	TUNG 301.2	2.58119	0.26119		2.557	0.241	2.41275	1.9867	1.21445	2014-02-20	13:56:00	3716	-4125	1289	-8	-1	898729	482274	-50985	TUNG 301.2	0.000575816	-3.27983e-05
20140220@398.asc	TUNG 301.1	7.0513	0.26119		7.027	0.195	2.40201	1.98354	1.21097	2014-02-20	14:00:00	3720	-4125	1226	-8	-1	898729	482274	-50985	TUNG 301.1	0.000587182	-2.14324e-05
20140220@399.asc	TUNG 301.3	2.8462	0.26119		2.822	0.221	2.40678	1.98111	1.21487	2014-02-20	14:03:00	3723	-4126	1321	-8	-1	898729	482274	-50985	TUNG 301.3	0.00057791	-3.07047e-05
20140220@400.asc	TUNG 301.4	2.47219	0.26119		2.448	0.194	2.41281	1.98299	1.21675	2014-02-20	14:08:00	3728	-4128	1356	-8	-1	898729	482274	-50985	TUNG 301.4	0.000621115	1.24997e-05
20140220@401.asc	TUNG 200.1	6.83629	0.26119		6.812	0.3	2.40893	1.99062	1.21015	2014-02-20	14:12:00	3732	-4006	814	-4	-1	898729	482274	-50985	TUNG 200.1	0.000864254	0.000255639
20140220@402.asc	TUNG 200.2	7.1323	0.26119		7.108	0.211	2.41547	1.99167	1.21279	2014-02-20	14:15:00	3735	-3986	787	-4	-2	898729	482274	-50985	TUNG 200.2	0.000752061	0.000143446
20140220@403.asc	TUNG 200.3	6.72129	0.26119		6.697	0.242	2.40669	1.99058	1.20904	2014-02-20	14:19:00	3739	-3962	769	-3	-1	898729	482274	-50985	TUNG 200.3	0.00063935	3.07356e-05
20140220@404.asc	TUNG 200.4	4.21223	0.26119		4.188	0.196	2.41163	1.98846	1.21281	2014-02-20	14:23:00	3743	-3910	750	-5	-2	898729	482274	-50985	TUNG 200.4	0.000597997	-1.06181e-05
20140220@405.asc	ESG11 KIM-5				5.237	0.227	2.4095	1.97798	1.21816	2014-02-20	14:28:00	3748	37	-414	0	-1	898729	482274	-50985	KIM-5/	0.000636202
20140220@406.asc	ESG11 KIM-5				5.062	0.231	2.41288	1.97822	1.21973	2014-02-20	14:31:00	3751	37	-434	0	0	898729	482274	-50985	KIM-5/	0.000638804
20140220@407.asc	ESG11 KIM-5				5.225	0.222	2.40962	1.97708	1.21878	2014-02-20	14:34:00	3754	37	-454	0	0	898729	482274	-50985	KIM-5/	0.000643928
20140220@408.asc	ESG11 KIM-5				5.108	0.231	2.39601	1.97137	1.2154	2014-02-20	14:38:00	3758	37	-474	0	0	898729	482274	-50985	KIM-5/	0.000644567
	average and 2SD				5.158	0.172997															0.000640875
	bracket average and 2SD	5.09		-0.0241272	5.06575	0.26119															0.000608615
20140220@409.asc	TUNG 203.1	8.34479	0.46918		8.217	0.232	2.37643	1.96554	1.20905	2014-02-20	14:42:00	3762	-4443	1012	-1	-1	898729	482274	-50985	TUNG 203.1	0.000633411	-2.5007e-05
20140220@410.asc	TUNG 203.2	7.37366	0.46918		7.246	0.158	2.36634	1.96644	1.20336	2014-02-20	14:46:00	3766	-4539	922	-1	-1	898729	482274	-50985	TUNG 203.2	0.000633096	-2.53228e-05
20140220@411.asc	TUNG 122.1	2.9541	0.46918		2.827	0.242	2.3649	1.96179	1.20548	2014-02-20	14:49:00	3769	-4522	1866	-2	-1	898729	482274	-50985	TUNG 122.1	0.000662319	3.90031e-06
20140220@412.asc	TUNG 122.2	7.34766	0.46918		7.22	0.213	2.34634	1.95737	1.19872	2014-02-20	14:52:00	3772	-4576	1921	-1	-1	898729	482274	-50985	TUNG 122.2	0.000675924	1.75059e-05
20140220@413.asc	TUNG 27.2	6.98562	0.46918		6.858	0.247	2.36049	1.95705	1.20615	2014-02-20	14:56:00	3776	-4839	2010	0	-1	898729	482274	-50985	TUNG 27.2	0.000626239	-3.21792e-05
20140220@414.asc	TUNG 27.1	6.97861	0.46918		6.851	0.234	2.36105	1.95615	1.20699	2014-02-20	15:00:00	3780	-4810	2098	0	-1	898729	482274	-50985	TUNG 27.1	0.000677485	1.90668e-05
20140220@415.asc	TUNG 28.1	7.10963	0.46918		6.982	0.206	2.34383	1.95361	1.19974	2014-02-20	15:03:00	3783	-5022	1943	0	-3	898729	482274	-50985	TUNG 28.1	0.000630389	-2.80299e-05
20140220@416.asc	TUNG 28.2	5.66545	0.46918		5.538	0.196	2.35872	1.96093	1.20286	2014-02-20	15:07:00	3787	-4992	2088	1	-2	898729	482274	-50985	TUNG 28.2	0.000646343	-1.20752e-05
20140220@417.asc	TUNG 123.1	3.52618	0.46918		3.399	0.276	2.37958	1.97481	1.20497	2014-02-20	15:11:00	3791	-4953	2353	1	-1	898729	482274	-50985	TUNG 123.1	0.000620924	-3.74943e-05
20140220@418.asc	TUNG 123.3	6.92661	0.46918		6.799	0.186	2.39676	1.98573	1.20699	2014-02-20	15:14:00	3794	-4990	2449	1	-1	898729	482274	-50985	TUNG 123.3	0.000703678	4.52594e-05
20140220@419.asc	TUNG 25.1	8.93286	0.46918		8.805	0.257	2.39444	1.9826	1.20773	2014-02-20	15:18:00	3798	-3462	1852	-4	0	898729	482274	-50985	TUNG 25.1	0.000828488	0.00017007
20140220@420.asc	TUNG 25.2	6.8966	0.46918		6.769	0.211	2.39096	1.97481	1.21073	2014-02-20	15:22:00	3802	-3479	2021	-5	0	898729	482274	-50985	TUNG 25.2	0.00069111	3.26914e-05
20140220@421.asc	TUNG 25R	6.77259	0.46918		6.645	0.213	2.37229	1.96335	1.20829	2014-02-20	15:25:00	3805	-3478	2095	-5	0	898729	482274	-50985	TUNG 25R	0.000856588	0.000198169
20140220@422.asc	TUNG 24.2	4.18626	0.46918		4.059	0.309	2.36534	1.95561	1.20952	2014-02-20	15:29:00	3809	-3158	1899	-6	1	898729	482274	-50985	TUNG 24.2	0.000661309	2.89031e-06
20140220@423.asc	TUNG 24.3	5.57344	0.46918		5.446	0.247	2.3573	1.95565	1.20538	2014-02-20	15:32:00	3812	-3226	1845	-7	0	898729	482274	-50985	TUNG 24.3	0.000649833	-8.58529e-06
20140220@424.asc	ESG11 KIM-5				4.811	0.248	2.37146	1.94587	1.21872	2014-02-20	15:36:00	3816	95	-403	-3	-1	898729	482274	-50985	KIM-5/	0.000663588
20140220@425.asc	ESG11 KIM-5				4.726	0.296	2.37158	1.94501	1.21932	2014-02-20	15:39:00	3819	95	-423	-3	0	898729	482274	-50985	KIM-5/	0.000673405
20140220@426.asc	ESG11 KIM-5				4.93	0.215	2.35982	1.94274	1.21469	2014-02-20	15:42:00	3822	95	-443	-2	1	898729	482274	-50985	KIM-5/	0.000683146
20140220@427.asc	ESG11 KIM-5				4.602	0.191	2.35508	1.93816	1.21511	2014-02-20	15:46:00	3826	95	-463	-2	1	898729	482274	-50985	KIM-5/	0.000683707
	average and 2SD				4.76725	0.276672															0.000675961
	bracket average and 2SD	5.09		-0.12673	4.96262	0.46918															0.000658418
20140220@428.asc	TUNG 117.1	3.09394	0.314177		2.75	0.208	2.31746	1.93401	1.19827	2014-02-20	15:50:00	3830	-1896	2253	1	0	898729	482274	-50985	TUNG 117.1	0.000665681	-4.95922e-06
20140220@429.asc	TUNG 117.2	6.80421	0.314177		6.459	0.266	2.31049	1.93249	1.1956	2014-02-20	15:54:00	3834	-1891	2159	0	1	898729	482274	-50985	TUNG 117.2	0.000688581	1.79409e-05
20140220@430.asc	TUNG 15.1	7.25837	0.314177		6.913	0.173	2.31407	1.9328	1.19726	2014-02-20	15:58:00	3838	-1188	2274	-1	2	898729	482274	-50985	TUNG 15.1	0.000693599	2.29588e-05
20140220@431.asc	TUNG 15.2	6.69418	0.314177		6.349	0.259	2.30857	1.93327	1.19413	2014-02-20	16:01:00	3841	-1301	2232	-2	1	898729	482274	-50985	TUNG 15.2	0.000766267	9.5627e-05
20140220@432.asc	TUNG 13.1	5.0046	0.314177		4.66	0.142	2.32109	1.93574	1.19908	2014-02-20	16:05:00	3845	-926	1784	-3	2	898729	482274	-50985	TUNG 13.1	0.00066098	-9.65993e-06
20140220@433.asc	TUNG 13.2	7.10231	0.314177		6.757	0.275	2.31614	1.93347	1.19792	2014-02-20	16:08:00	3848	-972	1847	-3	1	898729	482274	-50985	TUNG 13.2	0.000685955	1.53151e-05
20140220@434.asc	TUNG 12.2	3.03292	0.314177		2.689	0.293	2.31502	1.92603	1.20196	2014-02-20	16:12:00	3852	-655	2052	-3	2	898729	482274	-50985	TUNG 12.2	0.000687502	1.68619e-05
20140220@435.asc	TUNG 12.1	6.90625	0.314177		6.561	0.248	2.30512	1.92044	1.20031	2014-02-20	16:16:00	3856	-580	2157	-3	2	898729	482274	-50985	TUNG 12.1	0.000689627	1.89864e-05
20140220@436.asc	TUNG 12.3	5.73785	0.314177		5.393	0.249	2.2922	1.91344	1.19795	2014-02-20	16:19:00	3859	-612	2121	-4	2	898729	482274	-50985	TUNG 12.3	0.000670951	3.10675e-07
20140220@437.asc	TUNG 12.4	2.9719	0.314177		2.628	0.261	2.28324	1.91098	1.1948	2014-02-20	16:22:00	3862	-640	2084	-3	3	898729	482274	-50985	TUNG 12.4	0.000700132	2.94916e-05
20140220@438.asc	ESG11 KIM-5				4.438	0.188	2.3072	1.90233	1.21283	2014-02-20	16:27:00	3867	123	-419	2	0	898729	482274	-50985	KIM-5/	0.000675509
20140220@439.asc	ESG11 KIM-5				4.862	0.299	2.30708	1.90194	1.21302	2014-02-20	16:30:00	3870	123	-439	2	0	898729	482274	-50985	KIM-5/	0.000700366
20140220@440.asc	ESG11 KIM-5 Cs-ReS=148				4.798	0.18	2.53009	2.06744	1.22378	2014-02-20	16:37:00	3877	125	-461	7	1	898729	482274	-50985	KIM-5/	0.000648367
20140220@441.asc	ESG11 KIM-5				4.796	0.218	2.56634	2.09372	1.22573	2014-02-20	16:41:00	3881	125	-481	8	2	898729	482274	-50985	KIM-5/	0.000637035
	average and 2SD				4.7235	0.385571															0.000665319
	bracket average and 2SD	5.09		-0.34288	4.74538	0.314177															0.00067064
20140220@442.asc	TUNG 20.2	5.84386	0.291722		5.528	0.186	2.57395	2.10925	1.22031	2014-02-20	16:46:00	3886	-2046	1997	1	1	898729	482274	-50985	TUNG 20.2	0.000675338	3.46288e-05
20140220@443.asc	TUNG 18	2.49581	0.291722		2.181	0.15	2.59484	2.11567	1.22649	2014-02-20	16:50:00	3890	-1746	2293	0	1	898729	482274	-50985	TUNG 18	0.000665473	2.4764e-05
20140220@444.asc	TUNG 23.2	3.82423	0.291722		3.509	0.21	2.59594	2.11246	1.22887	2014-02-20	16:53:00	3893	-3034	2235	-2	0	898729	482274	-50985	TUNG 23.2	0.000610851	-2.98578e-05
20140220@445.asc	TUNG 119.1	7.06625	0.291722		6.75	0.21	2.59978	2.11821	1.22735	2014-02-20	16:57:00	3897	-3842	2369	1	0	898729	482274	-50985	TUNG 119.1	0.000662942	2.22334e-05
20140220@446.asc	TUNG 121	8.62874	0.291722		8.312	0.195	2.59824	2.12693	1.22159	2014-02-20	17:01:00	3901	-4130	2349	2	-1	898729	482274	-50985	TUNG 121	0.000617852	-2.28569e-05
20140220@447.asc	TUNG 120	6.07093	0.291722		5.755	0.238	2.60508	2.12838	1.22397	2014-02-20	17:04:00	3904	-4000	1887	2	-1	898729	482274	-50985	TUNG 120	0.000654476	1.3767e-05
20140220@448.asc	TUNG 26.2	2.76089	0.291722		2.446	0.182	2.60236	2.12693	1.22353	2014-02-20	17:08:00	3908	-4565	2313	4	-2	898729	482274	-50985	TUNG 26.2	0.00061975	-2.09585e-05
20140220@449.asc	TUNG 19.2	8.96684	0.291722		8.65	0.174	2.62159	2.12603	1.23309	2014-02-20	17:12:00	3912	-1792	1852	-5	1	898729	482274	-50985	TUNG 19.2	0.000722355	8.16464e-05
20140220@450.asc	TUNG 116	1.97565	0.291722		1.661	0.16	2.6142	2.12494	1.23025	2014-02-20	17:16:00	3916	-1564	1992	-5	2	898729	482274	-50985	TUNG 116	0.000661781	2.10724e-05
20140220@451.asc	TUNG 17.1	8.72677	0.291722		8.41	0.191	2.61116	2.12236	1.23031	2014-02-20	17:19:00	3919	-1546	2323	-6	2	898729	482274	-50985	TUNG 17.1	0.000643713	3.00441e-06
20140220@452.asc	ESG11 KIM-5				4.83	0.145	2.63827	2.11461	1.24764	2014-02-20	17:23:00	3923	64	-425	-1	0	898729	482274	-50985	KIM-5/	0.000622482
20140220@453.asc	ESG11 KIM-5				4.758	0.203	2.6357	2.11371	1.24695	2014-02-20	17:27:00	3927	64	-445	-1	0	898729	482274	-50985	KIM-5/	0.000625029
20140220@454.asc	ESG11 KIM-5				4.928	0.228	2.62417	2.11379	1.24145	2014-02-20	17:30:00	3930	64	-465	0	0	898729	482274	-50985	KIM-5/	0.000615751
20140220@455.asc	ESG11 KIM-5				4.785	0.209	2.61106	2.10992	1.23752	2014-02-20	17:33:00	3933	64	-485	0	1	898729	482274	-50985	KIM-5/	0.000601131
	average and 2SD				4.82525	0.149322															0.000616099
	bracket average and 2SD	5.09		-0.314027	4.77438	0.291722															0.000640709
20140220@456.asc	TUNG 115	5.43231	0.230854		5.262	0.282	2.58917	2.11082	1.22662	2014-02-20	17:38:00	3938	-1447	2073	2	1	898729	482274	-50985	TUNG 115	0.000715384	8.87809e-05
20140220@457.asc	TUNG 14.2	9.69003	0.230854		9.519	0.197	2.58293	2.11363	1.22203	2014-02-20	17:41:00	3941	-1211	1947	1	2	898729	482274	-50985	TUNG 14.2	0.000667723	4.11201e-05
20140220@458.asc	TUNG 114	4.42014	0.230854		4.25	0.207	2.58387	2.10796	1.22577	2014-02-20	17:44:00	3944	-1081	1775	1	2	898729	482274	-50985	TUNG 114	0.00066739	4.07874e-05
20140220@459.asc	TUNG 11.2	3.80803	0.230854		3.638	0.194	2.57758	2.1064	1.22369	2014-02-20	17:49:00	3949	-361	2040	-1	2	898729	482274	-50985	TUNG 11.2	0.000701691	7.50877e-05
20140220@460.asc	TUNG 109	4.35413	0.230854		4.184	0.168	2.57671	2.10178	1.22596	2014-02-20	17:56:00	3956	763	1679	-4	1	898729	482274	-50985	TUNG 109	0.000646952	2.0349e-05
20140220@461.asc	TUNG 106	5.24228	0.230854		5.072	0.196	2.58662	2.1037	1.22956	2014-02-20	18:00:00	3960	1063	1624	-4	2	898729	482274	-50985	TUNG 106	0.000714718	8.81147e-05
20140220@462.asc	TUNG 107.1	4.04707	0.230854		3.877	0.226	2.58512	2.1116	1.22425	2014-02-20	18:10:00	3970	1030	1907	-4	1	898729	482274	-50985	TUNG 107.1	0.000653304	2.67007e-05
20140220@463.asc	TUNG 8.2	7.63568	0.230854		7.465	0.223	2.59571	2.11281	1.22856	2014-02-20	18:13:00	3973	1115	2089	-5	1	898729	482274	-50985	TUNG 8.2	0.000617613	-8.98971e-06
20140220@464.asc	TUNG 7.1	4.91322	0.230854		4.743	0.227	2.58301	2.11187	1.22309	2014-02-20	18:21:00	3981	1356	1949	-5	0	898729	482274	-50985	TUNG 7.1	0.000665695	3.9092e-05
20140220@465.asc	TUNG 6.1	5.00023	0.230854		4.83	0.241	2.67921	2.10722	1.27144	2014-02-20	18:24:00	3984	1346	1636	-4	1	898729	482274	-50985	TUNG 6.1	0.000626105	-4.98413e-07
20140220@466.asc	TUNG 5.2	3.26194	0.230854		3.092	0.176	2.58093	2.10386	1.22676	2014-02-20	18:28:00	3988	1833	1654	-4	2	898729	482274	-50985	TUNG 5.2	0.000645733	1.91298e-05
20140220@467.asc	TUNG 4.1	2.4518	0.230854		2.282	0.291	2.60502	2.10229	1.23913	2014-02-20	18:31:00	3991	2306	1660	-7	1	898729	482274	-50985	TUNG 4.1	0.000622568	-4.03531e-06
20140220@468.asc	TUNG 1.2 SHUTTER OPEN	5.9514	0.230854		5.781	0.154	2.66323	2.10992	1.26224	2014-02-20	18:35:00	3995	2693	1611	-5	11	898729	482274	-50985	TUNG 1.2 SHUTTER OPEN	0.000682899	5.62955e-05
20140220@469.asc	TUNG 102.1	6.29345	0.230854		6.123	0.222	2.5903	2.1152	1.22461	2014-02-20	18:38:00	3998	2976	1765	-7	1	898729	482274	-50985	TUNG 102.1	0.00068275	5.61468e-05
20140220@470.asc	TUNG 101.1	5.30029	0.230854		5.13	0.213	2.60314	2.11344	1.23171	2014-02-20	18:42:00	4002	3046	2017	-7	0	898729	482274	-50985	TUNG 101.1	0.000637109	1.0506e-05
20140220@471.asc	ESG11 KIM-5				5.074	0.193	2.60623	2.09963	1.24128	2014-02-20	18:48:00	4008	149	-412	-4	0	898729	482274	-50985	KIM-5/	0.000615661
20140220@472.asc	ESG11 KIM-5				4.981	0.215	2.60908	2.10014	1.24234	2014-02-20	18:52:00	4012	149	-432	-4	0	898729	482274	-50985	KIM-5/	0.000638338
20140220@473.asc	ESG11 KIM-5				4.995	0.246	2.60497	2.10061	1.2401	2014-02-20	18:55:00	4015	149	-452	-3	1	898729	482274	-50985	KIM-5/	0.000646049
20140220@474.asc	ESG11 KIM-5				5.007	0.165	2.5913	2.10073	1.23352	2014-02-20	18:58:00	4018	149	-472	-3	2	898729	482274	-50985	KIM-5/	0.000648383
	average and 2SD				5.01425	0.082452															0.000637108
	bracket average and 2SD	5.09		-0.169388	4.91975	0.230854															0.000626603
20140220@475.asc	TUNG 2.2	8.73693	0.152356		8.686	0.206	2.57698	2.09963	1.22735	2014-02-20	19:02:00	4022	2774	1989	-6	1	898729	482274	-50985	TUNG 2.2	0.000679808	3.79734e-05
20140220@476.asc	TUNG 103.2	8.78694	0.152356		8.736	0.181	2.579	2.10096	1.22754	2014-02-20	19:05:00	4025	3051	1536	-5	1	898729	482274	-50985	TUNG 103.2	0.000658017	1.61824e-05
20140220@477.asc	TUNG 105	11.9241	0.152356		11.873	0.265	2.57506	2.10225	1.22491	2014-02-20	19:10:00	4030	1548	1680	-3	1	898729	482274	-50985	TUNG 105	0.00062528	-1.65554e-05
20140220@478.asc	TUNG 111	7.13585	0.152356		7.085	0.222	2.54665	2.09251	1.21703	2014-02-20	19:14:00	4034	-191	1910	0	2	898729	482274	-50985	TUNG 111	0.000677287	3.54521e-05
20140220@479.asc	TUNG 4.3	2.37961	0.152356		2.329	0.175	2.57637	2.08973	1.23287	2014-02-20	19:18:00	4038	2335	1634	-6	1	898729	482274	-50985	TUNG 4.3	0.00076747	0.000125635
20140220@480.asc	TUNG 4.4	2.98264	0.152356		2.932	0.144	2.57092	2.09329	1.22817	2014-02-20	19:22:00	4042	2365	1604	-5	1	898729	482274	-50985	TUNG 4.4	0.000619243	-2.25921e-05
20140220@481.asc	TUNG 4.5	6.82284	0.152356		6.772	0.195	2.57264	2.09724	1.22667	2014-02-20	19:25:00	4045	2395	1574	-5	0	898729	482274	-50985	TUNG 4.5	0.000670135	2.82995e-05
20140220@482.asc	TUNG 104.1	1.15755	0.152356		1.107	0.215	2.57127	2.09181	1.22921	2014-02-20	19:29:00	4049	2224	2089	-6	0	898729	482274	-50985	TUNG 104.1	0.00063478	-7.05495e-06
20140220@483.asc	TUNG 112.1	5.37376	0.152356		5.323	0.196	2.53906	2.08512	1.21771	2014-02-20	19:35:00	4055	-458	1709	1	2	898729	482274	-50985	TUNG 112.1	0.000640968	-8.6725e-07
20140220@484.asc	TUNG 104.2	1.44657	0.152356		1.396	0.241	2.54144	2.07557	1.22445	2014-02-20	19:40:00	4060	2280	2059	-6	-1	898729	482274	-50985	TUNG 104.2	0.000647601	5.76625e-06
20140220@485.asc	TUNG 104.3	4.48272	0.152356		4.432	0.229	2.51328	2.07084	1.21365	2014-02-20	19:43:00	4063	2219	2179	-6	0	898729	482274	-50985	TUNG 104.3	0.000637062	-4.77335e-06
20140220@486.asc	TUNG 4.2	5.12675	0.152356		5.076	0.365	2.52047	2.06861	1.21844	2014-02-20	19:47:00	4067	2292	1754	-6	1	898729	482274	-50985	TUNG 4.2	0.000715203	7.33682e-05
20140220@487.asc	TUNG 4.6	1.81458	0.152356		1.764	0.126	2.52142	2.06192	1.22285	2014-02-20	19:50:00	4070	2267	1729	-7	2	898729	482274	-50985	TUNG 4.6	0.000653274	1.1439e-05
20140220@488.asc	TUNG 4.7	1.72758	0.152356		1.677	0.196	2.50783	2.0575	1.21887	2014-02-20	19:53:00	4073	2242	1704	-7	2	898729	482274	-50985	TUNG 4.7	0.0006656	2.37648e-05
20140220@489.asc	TUNG 4.8	7.09485	0.152356		7.044	0.226	2.497	2.0557	1.21467	2014-02-20	19:57:00	4077	2222	1684	-8	1	898729	482274	-50985	TUNG 4.8	0.000774159	0.000132324
20140220@490.asc	ESG11 KIM-5				5.117	0.253	2.51189	2.05222	1.22399	2014-02-20	20:01:00	4081	4	-405	-4	1	898729	482274	-50985	KIM-5/	0.000647102
20140220@491.asc	ESG11 KIM-5				5.179	0.223	2.50855	2.04244	1.22821	2014-02-20	20:04:00	4084	4	-425	-5	0	898729	482274	-50985	KIM-5/	0.000650986
20140220@492.asc	ESG11 KIM-5				4.964	0.159	2.51143	2.03708	1.23285	2014-02-20	20:07:00	4087	4	-445	-6	-1	898729	482274	-50985	KIM-5/	0.000644297
20140220@493.asc	ESG11 KIM-5				4.997	0.239	2.50023	2.03763	1.22703	2014-02-20	20:10:00	4090	4	-465	-5	0	898729	482274	-50985	KIM-5/	0.000643865
	average and 2SD				5.06425	0.201735															0.000646562
	bracket average and 2SD	5.09		-0.050493	5.03925	0.152356															0.000641835
	MASS CALIBRATION NMR=1007650
20140220@494.asc	ESG11 KIM-5				5.2	0.267	2.50881	2.04041	1.22956	2014-02-20	20:20:00	4100	-16	-425	-5	0	898737	482274	-50985	KIM-5/	0.000694382
20140220@495.asc	ESG11 KIM-5				5.308	0.213	2.60101	2.12787	1.22235	2014-02-20	20:23:00	4103	-16	-445	-5	0	898737	482274	-50985	KIM-5/	0.000781628
20140220@496.asc	ESG11 KIM-5				5.175	0.225	2.71013	2.20243	1.23052	2014-02-20	20:27:00	4107	-16	-465	-2	-1	898737	482274	-50985	KIM-5/	0.00050469
20140220@497.asc	ESG11 KIM-5				5.161	0.178	2.66285	2.16355	1.23078	2014-02-20	20:30:00	4110	-16	-485	-2	-1	898737	482274	-50985	KIM-5/	0.000462204
	average and 2SD				5.211	0.133297

## Sheet: Info
This Supplemental Material accompanies Gottlieb, E.S., Miller, E.L., Valley, J.W.,
Fisher, C.M., Vervoort, J.D., and Kitajima, K., 2022, Zircon petrochronology of Cretaceous
Cordilleran interior granites of the Snake Range and Kern Mountains, Nevada, USA,
in Craddock, J.P., Malone, D.H., Foreman, B.Z., and Konstantinou, A., eds., Tectonic Evolution
of the Sevier-Laramide Hinterland, Thrust Belt, and Foreland, and Postorogenic Slab Rollback
(180–20 Ma): GSA Special Paper 555, https://doi.org/10.1130/2022.2555(02).
